# Supplementary material for: The Development and Survival but Not Function of Follicular B Cells Is Dependent on IL-7Rα Tyr449 Signaling
Source: PubMed Central journal article supplement (PMC3923819; doi:10.1371/journal.pone.0088771), 2014-02-13
Supplement: pone.0088771.s002.pdf [file pone.0088771.s002.pdf]

Table S1 - Antibodies

| Antibody | Label           | Company                | Clone        |
|----------|-----------------|------------------------|--------------|
| AA4.1    | PE              | eBioscience            | AA4.1        |
| B220     | APC             | eBioscience            | RA3-6B2      |
| B220     | APC-Cy7         | eBioscience            | RA3-6B2      |
| B220     | APC-eFluor780   | eBioscience            | RA3-6B2      |
| B220     | FITC            | eBioscience            | RA3-6B3      |
| BAFFR    | APC             | eBioscience            | eBio7H22-E16 |
| CD19     | Alexa700        | eBioscience            | 1D3          |
| CD19     | FITC            | eBioscience            | 1D3          |
| CD19     | Pacific Blue    | BioLegend              | 6D5          |
| CD19     | PE              | BD Biosystems          | 1D3          |
| CD21     | PE              | eBioscience            | 8D9          |
| CD21     | APC             | eBioscience            | 8D9          |
| CD23     | PE-Cy7          | eBioscience            | B3B4         |
| CD45.1   | Biotin          | BD Biosystems          | A20          |
| CD45.1   | FITC            | BD Biosystems          | A20          |
| CD45.1   | PE              | BD Biosystems          | A20          |
| CD45.2   | APC             | eBioscience            | 104          |
| CD45.2   | APC-Cy7         | eBioscience            | 104          |
| CD45.2   | APC-eFluor780   | eBioscience            | 104          |
| IgM      | PerCP-Cy5.5     | eBioscience            | II/41        |
| IgM      | PerCP-eFluor710 | eBioscience            | II/41        |
| IgM      | DyLight488      | Jackson Immunoresearch | Polyclonal   |
| IgD      | V450            | BD Bioscience          | 11-26c.2a    |
